# Supplementary material for: Safety and effectiveness of RBD-specific polyclonal equine F(ab´)2 fragments for the treatment of hospitalized patients with severe Covid-19 disease: A retrospective cohort study
Source: PubMed Central journal article supplement (PMC9512184; doi:10.1371/journal.pone.0274796), 2022-09-26
Supplement: pone.0274796.s001.pdf [file pone.0274796.s001.pdf]

# 1 **Supporting information**

## 2 **Methods**

### 3 **Severity of illness categorization**

4 The severity criteria for Covid-19 suggested by the National Institutes of Health (NIH) were used  
5 for the present study [1].

6 As such, we considered asymptomatic or presymptomatic Infection in those individuals who test  
7 positive for SARS-CoV-2 using a virologic test (i.e., a nucleic acid amplification test [NAAT] or  
8 an antigen test) but who have no symptoms that are consistent with COVID-19.

9 Mild illness in individuals who have any of the various signs and symptoms of COVID-19 (e.g.,  
10 fever, cough, sore throat, malaise, headache, muscle pain, nausea, vomiting, diarrhea, loss of taste  
11 and smell) but who do not have shortness of breath, dyspnea, or abnormal chest imaging.

12 Moderate illness was considered for individuals who show evidence of lower respiratory disease  
13 during clinical assessment or imaging and who have an oxygen saturation ( $SpO_2$ )  $\geq 94\%$  on room  
14 air at sea level. Severe illness was considered for individuals who have  $SpO_2 < 94\%$  on room air  
15 at sea level, a ratio of arterial partial pressure of oxygen to fraction of inspired oxygen ( $PaO_2/FiO_2$ )  
16  $< 300$  mm Hg, a respiratory rate  $> 30$  breaths/min, or lung infiltrates  $> 50\%$ .

17 And finally, Critical illness was considered for individuals who have respiratory failure, septic  
18 shock, and/or multiple organ dysfunction.

19

### 20 **Data collection and verification process**

21

22 **Data collection process for EPIC cohort group**

23 All data from EPIC patients in the cohort were retrieved from the prospective, structured registry  
24 designed within the frame of ANMAT's Provision 4622/12 regarding authorization under special  
25 conditions. In addition, a review of the HCEH's electronic medical records was performed for all  
26 selected patients in order to complete other data of interest. For the selection of the exposed patients  
27 a complete list of admissions included in the registry from the HCEH' between January 27th and  
28 April 17th, 2021, was reviewed. Patients with severe disease (defined as having respiratory rate of  
29 more than 30/min, or oxygen saturation <94% on room air at sea level, or a ratio of arterial partial  
30 pressure of oxygen to fraction of inspired oxygen (PaO<sub>2</sub>/FiO<sub>2</sub>) <300 mm Hg, or lung compromise  
31 of more than 50%) at the initiation of EPIC treatment within 24 hours of hospitalization were  
32 identified. Patients having moderate disease (including patients that received supplementary  
33 oxygen within 24 hours of hospitalization but with no documentation of tachypnea, oxygen  
34 desaturation or lung compromise above 50% through imaging) were excluded from this cohort  
35 group, as well as patients with mild and critical disease (including patients admitted to ICU,  
36 receiving mechanical ventilation or requiring inotropic drugs since hospital admission).

37 Review of the electronic medical records was started with the patients with earlier admission  
38 (January 27th, 2021) and moved forward toward the more recent admission dates until reaching  
39 the target sample of patients that had received at least one dose of EPIC. The medical data  
40 collection team retrieved the additional data of interest in a specific structured form developed for  
41 that purpose. After verification of completeness, a different team added the information to the  
42 electronic study database in an anonymized fashion.

43

44 **Data collection process for the “Control” cohort group**

45 For the selection of the “Control” patient group a complete list of all patients within 18- and 79-  
46 year-old admitted to the “HCEH” between November 25th, 2020 and January 21st, 2021 was  
47 obtained.

48 The medical data collection team thoroughly reviewed each electronic medical record in order to  
49 evaluate the selection criteria and completed the specific structured forms with the clinical data of  
50 the selected patients. This review was performed starting with the more recent admissions and  
51 moved backward until reaching the target sample complying the selection criteria. Again, a  
52 verification of completeness was performed before a different data team added this information to  
53 the electronic study database in an anonymized fashion.

54

55 **Data validation process**

56 A complete review and validation of all information included in the database was performed. An  
57 iterative process of generation of lists with all pending discrepancies and inconsistencies was  
58 implemented until final database closure. Site Principal Investigator signed electronically all final  
59 electronic case report forms that remained inalterable and protected from that moment onwards.  
60 Finally, a complete analysis of the data was carried out following the Statistical Analysis Plan.

61

62 **Statistical Analysis Plan**

63

## 64 **Operationalization of variables**

65 Age in years, BMI, PaO<sub>2</sub>/FiO<sub>2</sub>, Charlson Score and NEWS score were considered as continuous  
66 variables, while presence and type of comorbidities, prior use of convalescent plasma, diagnostic  
67 method, respiratory rate ( $\leq 20$  or  $>20$ /min), requirement of supplementary oxygen and oxygen  
68 saturation ( $\leq 94$  or  $>94\%$ ) were considered as categorical (dichotomous) variables. The thresholds  
69 for the categorization of numerical variables were defined by medical advice prior to the analysis  
70 of results.

71

## 72 **Descriptive analysis**

73 Categorical variables were presented as absolute and relative frequencies (percentage). Numerical  
74 variables were presented as mean and standard deviation or median and interquartile range  
75 whenever appropriate. Thresholds for the categorical variables were defined upon medical criteria  
76 and literature search prior to the process of data analysis.

77 All patient characteristics from the EPIC and Control groups were compared in order to detect  
78 potential confounders. Categorical variables were compared using the Chi square or Fisher's exact  
79 test and quantitative characteristics were compared using Student's T test or Mann Whitney's U  
80 test according with assumptions.

81 Although the study design itself may equalize overall EPIC and Control patient characteristics,  
82 since the authorization date for the use of EPIC at the HCEH is independent from the patient's  
83 characteristics, all association measurements were presented either as raw data and adjusted for  
84 inverse probability of treatment weighting (IPTW) and potential confounders, defining a doubly

85 robust method for estimation of the potential causal effect of the intervention of interest in  
86 comparison with the “non-exposed” cohort patients.

87 Given the observational nature of the study, all patient characteristics showing statistically  
88 significant differences were considered as potential confounders in addition to all variables  
89 identified “a priori” by researcher’s medical criteria.

90

### 91 **Time to event without competing events**

92 Taking into consideration the mortality events as right-censored events, there were no competing  
93 events for the primary outcome and its cumulative incidence was estimated using the Kaplan Meier  
94 method. Cumulative incidence curves according to time were presented at 28 days of follow up.  
95 Mortality cumulative incidence at days 14, 21 and 28 were estimated with 95% confidence  
96 intervals (CI95%). Median time to event and 25-75% percentiles were calculated. A comparison  
97 of survival curves between the two cohort groups was made with Cox-Mantel hypothesis test  
98 considering null hypothesis as survival curve overlap between EPIC and Control.

99 An univariate Cox proportional hazard regression model was used for estimation of the Hazard  
100 Ratio (HR) between cohort groups using death as result variable. In addition, an adjusted HR was  
101 obtained through the same regression model using IPTW and weighting by potential confounders  
102 (doubly robust approach). Both raw and adjusted HR were calculated with their respective CI95%.  
103 Similar analysis was performed for hospital discharge as the interest variable.

104

105 **Clinical ordinal scale analysis**

106 An odds proportional ordinal regression model was used for the comparison of the distribution of  
107 the WHO-modified clinical ordinal scale between cohort groups at days 14, 21 and 28 of follow  
108 up. This model estimates a common OR for the difference between ordinal categories of the result  
109 variable. Proportional OR assumption was evaluated with Brant test (parallel regression  
110 assumption). Given potential difficulties in the interpretation of the proportional OR or possible  
111 violations to the proportional OR assumption, the ordinal scale similarity between cohort groups  
112 was analyzed with the Kruskal Wallis H test at days 14, 21 and 28 of follow-up.

113 Both raw OR as well as weighted by IPTW and potential confounders were presented with their  
114 respective CI95%.

115

116 **Dichotomous categorical variables of safety and efficacy**

117 Similar analysis was performed for all dichotomous secondary outcomes: proportion of patients  
118 discharged from hospital at days 14, 21 and 28, proportion of patients admitted to ICU, proportion  
119 of patients requiring mechanical ventilation and proportion of patients with any/serious adverse  
120 events.

121 Considering as null hypothesis an equal proportion of each secondary outcome between EPIC and  
122 “Control” groups, a Chi square or Fisher's exact test were used according to assumptions. Bivariate  
123 logistic regression model was used to estimate the raw OR of both cohort groups. Adjusted HR  
124 were obtained through the same regression model using IPTW and weighting by potential

125 confounders (doubly robust approach). Both raw and adjusted HR were calculated with their  
126 respective CI95%.

127

### 128 **Time to event with competing events**

129 Considering mortality as a competing event, the secondary outcomes time to hospital discharge,  
130 time to discharge from ICU and time to initiation of mechanical ventilation were analyzed using  
131 Kaplan Meier method with right censored data. Cumulative incidence curves according to time  
132 were presented at 28 days of follow up. Median time to event and 25-75% percentiles were  
133 calculated. A Fine and Gray bivariate regression model considering death as a competing event  
134 was used for estimation of sub-Hazard Ratios (sHR) for each cohort group, using referred  
135 secondary outcomes as result variables. Similar Fine and Gray multivariate regression model was  
136 used weighted by IPTW and adjusted for potential confounders for estimation of the adjusted sHR.  
137 Both raw and adjusted sHR were presented with respective CI95%.

138

### 139 **Adjustment for potential confounders - Causal estimators**

140 Weighting by the inverse probability of receiving treatment (IPTW) and furtherly by potential  
141 confounders was implemented for adjustment by unbalanced confounders between EPIC and  
142 “Control” groups, in a doubly robust approach. In this way, association measures weighted by  
143 IPTW and adjusted for potential confounders correspond to the average causal effect in the  
144 population (Average Treatment Effect in the population, ATE).

145 A multivariate logistic regression model was used for calculation of the propensity score using  
146 exposition to EPIC as dichotomous response variable. All other identified potential causes of  
147 exposition or death were included as explanatory variables. In addition, all unbalanced variables  
148 and those considered as potential predictors of EPIC use or reflecting changes in diagnosis, staging,  
149 concomitant treatment or support measures between cohort groups were included as explanatory  
150 variables.

151 We estimated the propensity score (PS) of EPIC exposure using a logistic regression model with  
152 EPIC exposure as dependent variable and the following potential predictors of treatment: gender  
153 at birth, age, clinical parameters at cohort admission (respiratory rate, heart rate, body temperature,  
154 oxygen saturation), requirement of supplementary oxygen or non-invasive ventilation, Charlson´s  
155 Score, National Early Warning Score (NEWS), time from symptoms onset, prior use of angiotensin  
156 converting enzyme inhibitors, non-steroidal antiinflammatory agents, corticosteroids, heparin,  
157 immunosuppressors, ivermectin or statins; presence and number of comorbidities: obesity,  
158 cardiovascular disease, stroke, hemiplegia, arterial hypertension, chronic lung disease, chronic  
159 renal disease, dementia, peptic ulcer, diabetes with or without target organ damage, solid organ  
160 tumor or leukemia. With this propensity score we calculated the stabilized IPTW. The weights  
161 were truncated at percentile 1% and 99% in order to avoid extreme figures. The distribution  
162 overlap between EPIC and Control groups were verified using histogram figures. Overall variable  
163 balance after IPTW adjustment is shown in S1 Fig.

164 A null regression model with the same response variable but without explanatory variables was  
165 used for estimation of the marginal probability (MP) of the exposition to EPIC. With the propensity  
166 score and marginal probability, the individual weighting was calculated for each participant as the



167 stabilized inverse probability of treatment. This weighting is defined as PS/MP for the “EPIC”  
168 patient group and (1-PS)/(1-MP) for the “Control” patient group.

169 Multivariate regression models weighted for IPTW and adjusted for potential confounders were  
170 used for the estimation of ATE with the doubly robust approach. Standardized bias (standardized  
171 differences) was compared before and after applying IPTW. All standardized biases below 0,2  
172 after the use of IPTW were considered appropriate. All data were presented using Love plots with  
173 the STATA command defined by pbalchk user version 3.0.0 generated by Lunt” [2, 3].

174

#### 175 **Efficacy subgroup analysis**

176 A subgroup analysis was predefined for efficacy. Subgroup analysis results were presented as the  
177 P-value of the interaction test and the OR calculated for each subgroup. Based upon clinical  
178 interest, the following subgroups were pre-specified: gender at birth, age category groups (less  
179 than 65, or between 65 and 79 years old), time from symptoms initiation (less or more than 3 days,  
180 less or more than 5 days or between 5 and 10 days), obesity, presence and number of main  
181 comorbidities (immunosuppression, diabetes, arterial hypertension, cardiovascular disease) and  
182 obesity.

183 All tests were two-sided, and a P value < 0.05 was considered statistically significant. All statistical  
184 analysis was performed using STATA statistical software version 15.1 MP - Parallel Edition  
185 (Copyright 1985-2017 StataCorp LLC - StataCorp. 4905 Lakeway Drive, College Station, Texas  
186 77845 USA).

187

## 188 **Results**

### 189 **Population characteristics**

190 A complete description of patients' comorbidities at cohort entry is shown in S1 Table.

191

### 192 **Secondary analyses**

193 Patient's discharge at day 14 was significantly greater in the EPIC group than in the Control group  
194 -280 (79,9%) vs 281 (63%) OR 1.46 (95% CI 1.07 to 1.98), P=0.016 for IPTW adjustment. There  
195 were no differences between cohort groups in the rest of the secondary outcomes evaluated.

196 Other than mortality and WHO-modified ordinal clinical scale results, the complete results of  
197 secondary outcomes are provided in S2 Table.

198

### 199 **Sensitivity analyses**

200 Sensitivity analysis for mortality performed to subjects that received two complete doses of EPIC  
201 in comparison with Control group showed a significantly greater effect of the intervention (OR  
202 0.58 [95% CI 0,39 to 0.85] for IPTW adjustment and OR 0.57 [95% CI 0.37 to 0.86] for the doubly  
203 robust approach).

204 Sensitivity analysis comparing patients on the EPIC group with patients in the Control group that  
205 received convalescent plasma showed that the effect remained significant in favor of the

206 intervention (OR 0.62 [95% CI 0.42 to 0.93] for IPTW and OR 0.61 [95% CI 0.39 to 0.94]) for  
207 doubly robust analysis. Complete results of the sensitivity analyses are shown in S3 Table.

208 We performed an additional sensitivity analysis with the respiratory rate and oxygen saturation  
209 variables considered as continuous. In such case the OR for the primary outcome was 0.75 (95%  
210 CI 0.51 to 1.10) P=0.142 and the HR 0.78 (95% CI 0.55 to 1.10) P=0.160 for the IPTW adjustment,  
211 and OR 0.72 (95% CI 0.47 to 1.09) P=0.122 and HR 0.77 (95% CI 0.54 to 1.09) P=0.136 for the  
212 doubly robust approach.

213

## 214 **Safety**

215 No significant differences were found in the breakdown of adverse events according to systems  
216 and organs. A detailed description of the AEs between cohort groups can be found in S4 Table.

217

## 218 **References**

- 219 1. Available at: [https://www.covid19treatmentguidelines.nih.gov/overview/clinical-  
220 spectrum/](https://www.covid19treatmentguidelines.nih.gov/overview/clinical-<br/>220 <u>spectrum/</u>) (accessed March 2022)
- 221 2. Available at:  
222 [https://www.hcp.med.harvard.edu/sites/default/files/Methods%20for%20Constructing%20  
223 0and%20Assessing%20Propensity%20Scores.pdf](https://www.hcp.med.harvard.edu/sites/default/files/Methods%20for%20Constructing%20<br/>223 0and%20Assessing%20Propensity%20Scores.pdf)
- 224 3. [No title]. [cited 3 Apr 2021]. Available at:  
225 <http://personalpages.manchester.ac.uk/staff/mark.lunt/pbalchk.ado>

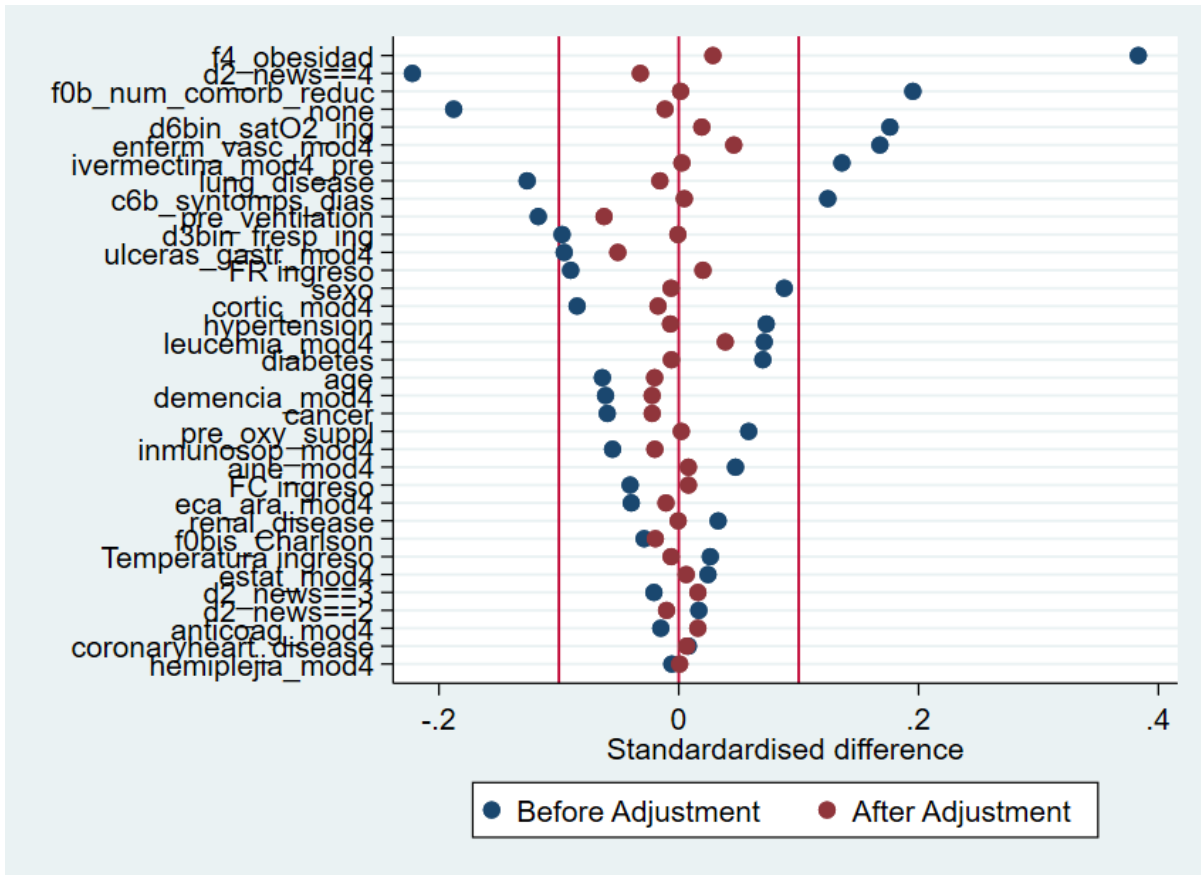

227

228 **S1 Fig. Balance assessment of study variables before and after IPTW adjustment.**

229

230

231

232

233

234

235

236

|                                            | <b>EPIC<br/>(N=395)</b> | <b>Control<br/>(N=446)</b> | <b>P value</b> |
|--------------------------------------------|-------------------------|----------------------------|----------------|
| <b>Coexisting conditions</b>               |                         |                            |                |
| <b>Charlson score</b>                      | 0 (0 - 2)               | 0 (0 - 2)                  | 0.9982†        |
| <b>Number of comorbidities#</b>            | 2 (1 - 3)               | 1 (1 - 3)                  | 0.0003†        |
| <b>None</b>                                | 9.1 (36)                | 15.0 (67)                  | 0.009          |
| <b>Hypertension</b>                        | 57.7 (228)              | 54.3 (242)                 | 0.313          |
| <b>Diabetes</b>                            | 28.1 (111)              | 24.7 (110)                 | 0.258          |
| <b>Obesity</b>                             | 59.5 (235)              | 40.6 (181)                 | <0.001         |
| <b>Cancer</b>                              | 2.0 (8)                 | 2.9 (13)                   | 0.409          |
| Tumor without metastasis                   | 1.8 (7)                 | 2.2 (10)                   | 0.807‡         |
| Tumor with metastasis                      | 0 (0)                   | 0.7 (3)                    | 0.252‡         |
| Leukemia                                   | 0.3 (1)                 | 0 (0)                      | 0.470‡         |
| Lymphoma o Myeloma multiple                | 0 (0)                   | 0 (0)                      |                |
| <b>Lung disease</b>                        | 7.1 (28)                | 10.5 (47)                  | 0.080          |
| <b>Liver disease</b>                       | 0.8 (3)                 | 0.7 (3)                    | 1.000‡         |
| <b>Renal disease</b>                       | 3.04 (12)               | 2.7 (12)                   | 0.763          |
| <b>Coronary and cardiovascular disease</b> | 6.3 (25)                | 6.3 (28)                   | 0.976          |

|                                                                                                                         |            |            |        |
|-------------------------------------------------------------------------------------------------------------------------|------------|------------|--------|
| <b>Stroke / Peripheral vascular disease</b>                                                                             | 4.8 (19)   | 2.0 (9)    | 0.024  |
| <b>Dementia</b>                                                                                                         | 1.3 (5)    | 2.0 (9)    | 0.395  |
| <b>Connective tissue disease</b>                                                                                        | 1.5 (6)    | 1.4 (6)    | 0.832  |
| <b>Gastric ulcer</b>                                                                                                    | 0 (0)      | 0.5 (2)    | 0.501‡ |
| <b>Hemiplegia</b>                                                                                                       | 1.5 (6)    | 1.6 (7)    | 0.953  |
| <b>AIDS</b>                                                                                                             | 0 (0)      | 0.2 (1)    | 1.000‡ |
| <b>Others</b> (including hypothyroidism, dislipidemia, gastrointestinal disease, drug allergies and rheumatic disease). | 37.2 (147) | 28.3 (126) | 0.006  |

237

238 **S1 Table. Cohort patient's comorbidities at entry.**

239

240

| <b>Outcomes</b>                            | <b>EPIC<br/>(N=395)</b> | <b>Control<br/>(N=446)</b> | <b>Estimator</b> | <b>Crude</b>                              | <b>IPTW†</b>                              | <b>Doubly<br/>robust<br/>adjustment‡</b>  |
|--------------------------------------------|-------------------------|----------------------------|------------------|-------------------------------------------|-------------------------------------------|-------------------------------------------|
| <b>Secondary outcomes</b>                  |                         |                            |                  |                                           |                                           |                                           |
| Patients with hospital discharge at day 28 | 78.5<br>(310)           | 75.6<br>(337)              | OR               | 1.17<br>(95%CI<br>0.85 - 1.61)<br>p 0.344 | 1.17<br>(95%CI<br>0.83 - 1.64)<br>p 0.374 | 1.16<br>(95%CI<br>0.80 - 1.68)<br>p 0.445 |
| Patients with hospital discharge at day 21 | 76.2<br>(301)           | 72.9<br>(325)              | OR               | 1.18<br>(95%CI<br>0.87 - 1.62)<br>p 0.293 | 1.17<br>(95%CI<br>0.84 - 1.62)<br>p 0.356 | 1.16<br>(95%CI<br>0.81 - 1.66)<br>p 0.428 |

|                                                       |              |               |     |                                        |                                        |                                        |
|-------------------------------------------------------|--------------|---------------|-----|----------------------------------------|----------------------------------------|----------------------------------------|
| Patients with hospital discharge at day 14            | 70.9 (280)   | 63 (281)      | OR  | 1.42<br>(95%CI 1.06 - 1.90)<br>p 0.018 | 1.46<br>(95%CI 1.07 - 1.98)<br>p 0.016 | 1.49<br>(95%CI 1.07 - 2.09)<br>p 0.018 |
| Time until discharge (days)#                          | 9 (6-15)     | 10 (6-17)     | sHR | 1.08<br>(95%CI 0.93 - 1.25)<br>p 0.298 | 1.07<br>(95%CI 0.92 - 1.25)<br>p 0.349 | 1.07<br>(95%CI 0.92 - 1.25)<br>p 0.402 |
| Patients requiring ICU admission                      | 20 (79)      | 23.8 (106)    | OR  | 0.8<br>(95%CI 0.58 - 1.11)<br>p 0.189  | 0.73<br>(95%CI 0.51 - 1.02)<br>p 0.069 | 0.71<br>(95%CI 0.49 - 1.03)<br>p 0.072 |
| Time since admission until discharge from ICU (days)# | 13 (11 - 23) | 13.5 (7 - 18) | sHR | 0.57<br>(95%CI 0.23 - 1.37)<br>p 0.207 | 0.47<br>(95%CI 0.19 - 1.15)<br>p 0.1   | 0.41<br>(95%CI 0.16 - 1.01)<br>p 0.054 |
| Patients requiring invasive mechanical ventilation    | 18.7 (74)    | 20.6 (92)     | OR  | 0.88<br>(95%CI 0.63 - 1.25)<br>p 0.491 | 0.82<br>(95%CI 0.57 - 1.17)<br>p 0.270 | 0.82<br>(95%CI 0.55 - 1.20)<br>p 0.299 |
| Time since admission until MV requirement (days)#     | ND           | ND            | sHR | 0.93<br>(95%CI 0.68 - 1.26)<br>p 0.642 | 0.86<br>(95%CI 0.71 - 1.38)<br>p 0.366 | 0.87<br>(95%CI 0.63 - 1.21)<br>p 0.420 |

241 ND: could not be determined

242 **S2 Table. Secondary outcomes**

243

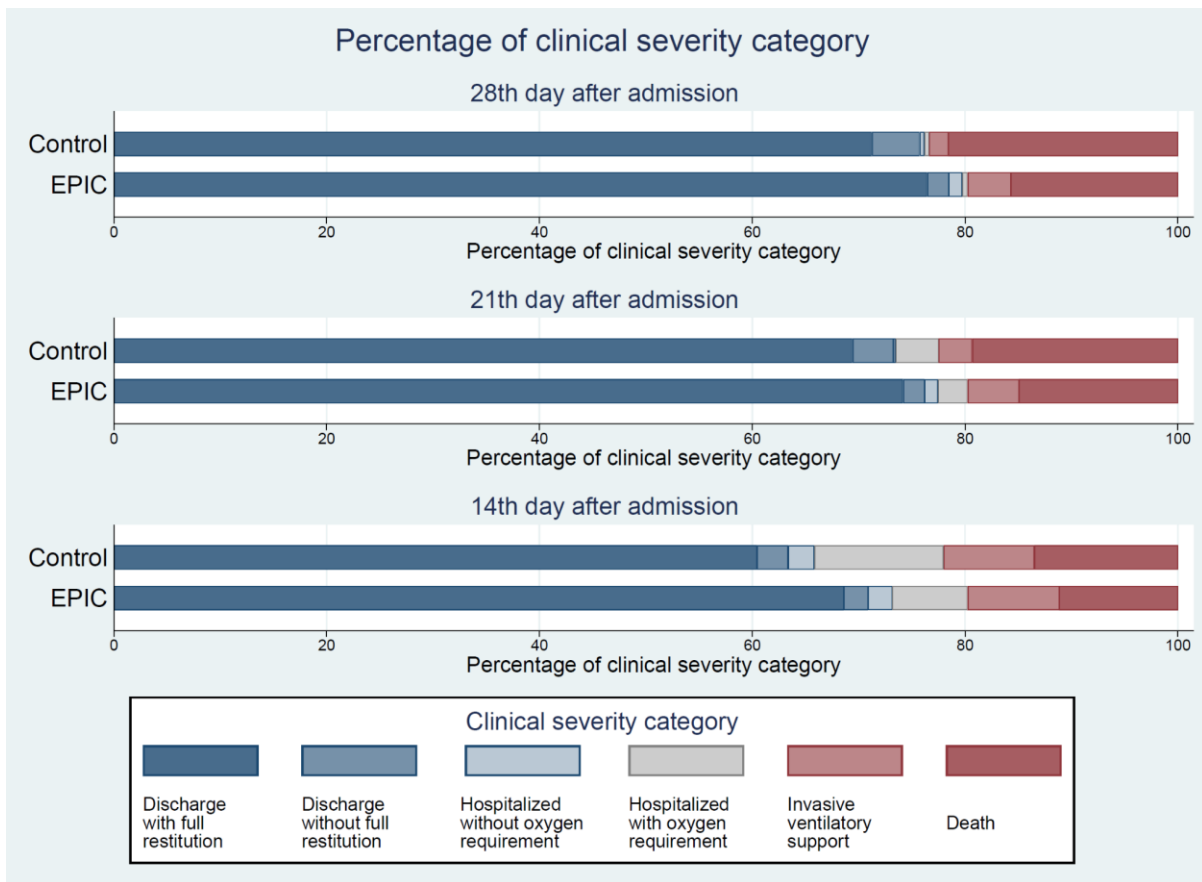

244

245

246 **S2 Fig. WHO 6-points ordinal clinical scale measured at days 14, 21 and 28**

247

248

249

250

251

252

253

254

255

256

257



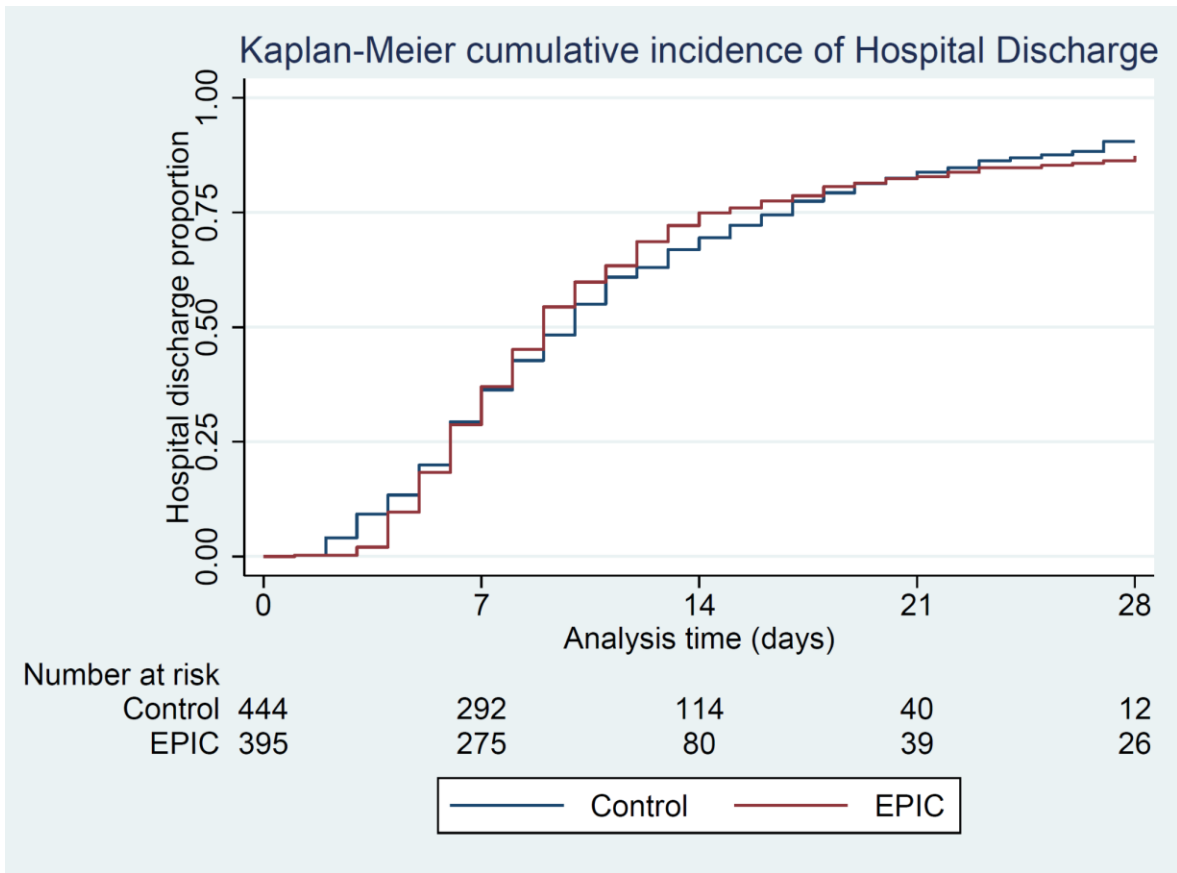

258

259 **S3 Fig. Incidence in hospital discharge (days)**

260

261

262

263

264

265

266

267

268

269

270

271

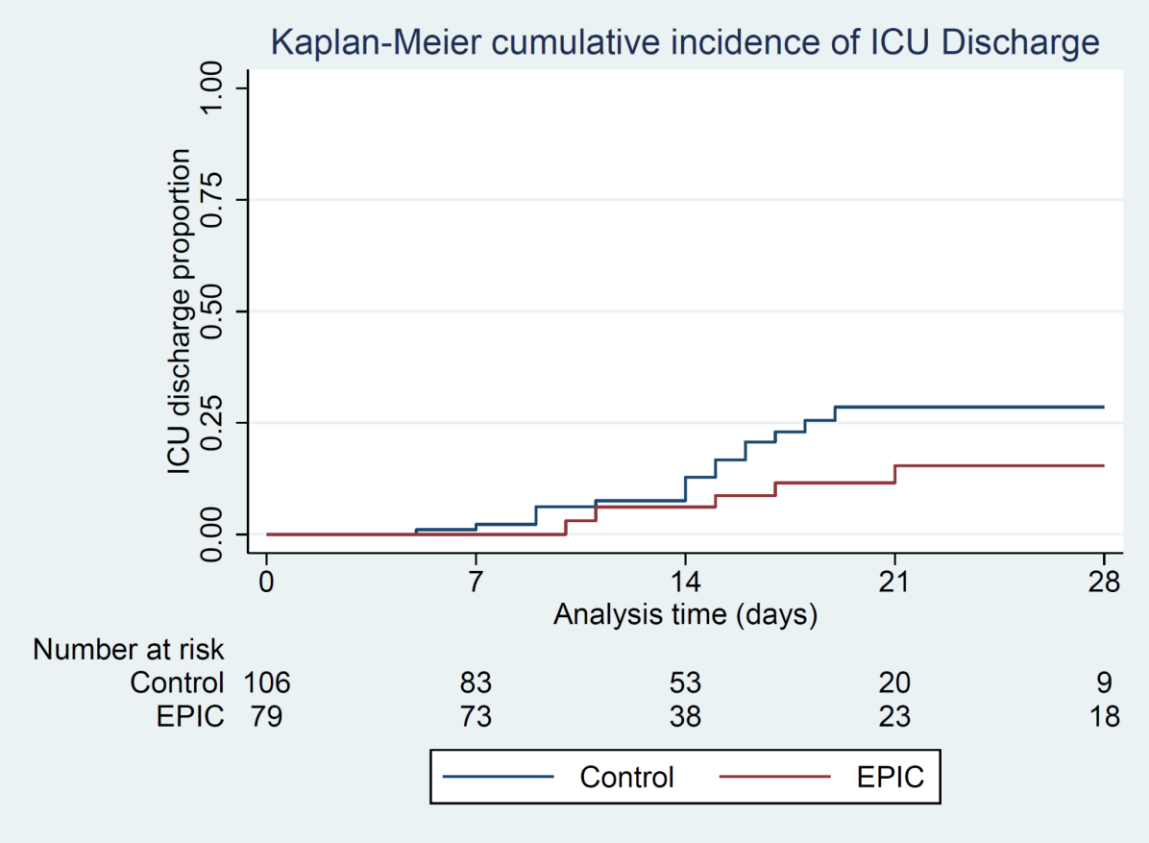

272

273 **S4 Fig. Time since admission until discharge from ICU (days)**

274

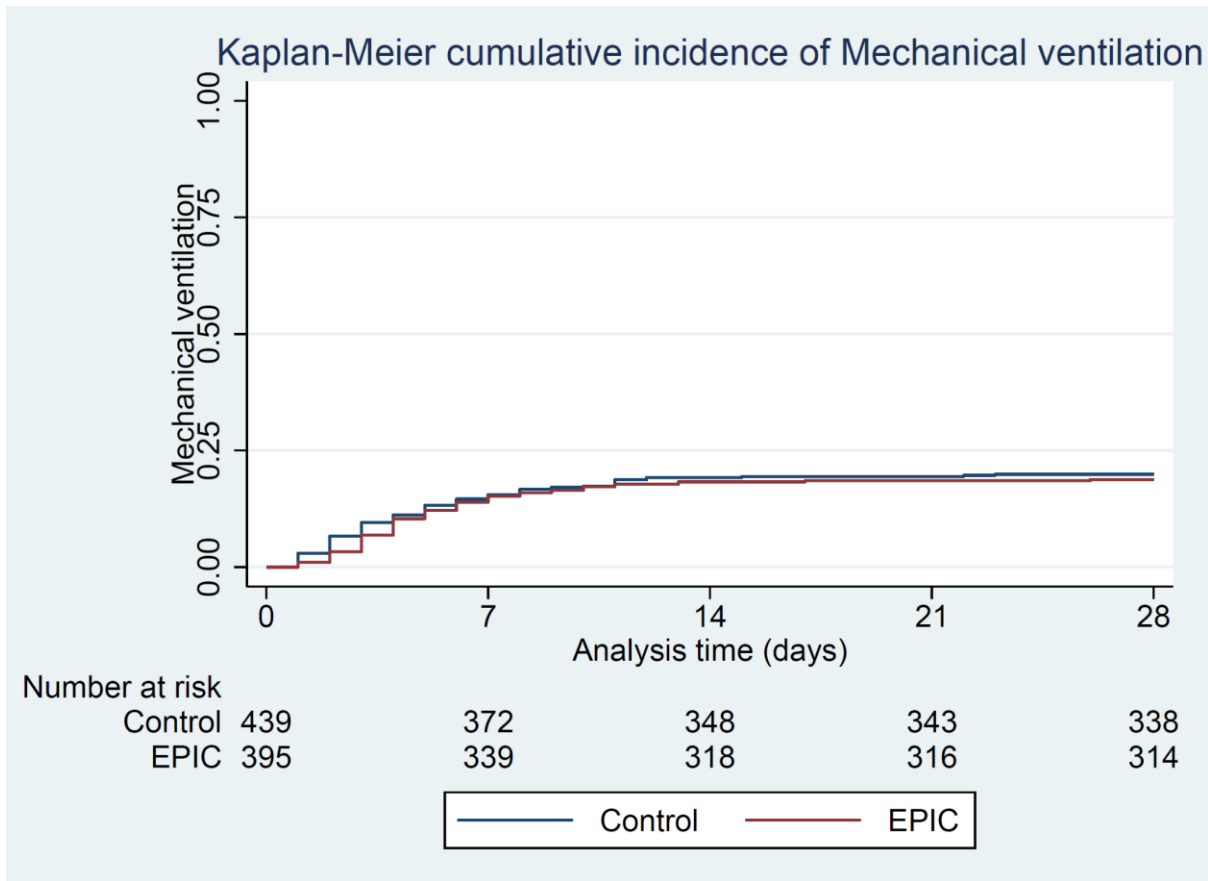

275

276 **S5 Fig. Time since admission until MV requirement (days)**

277

278

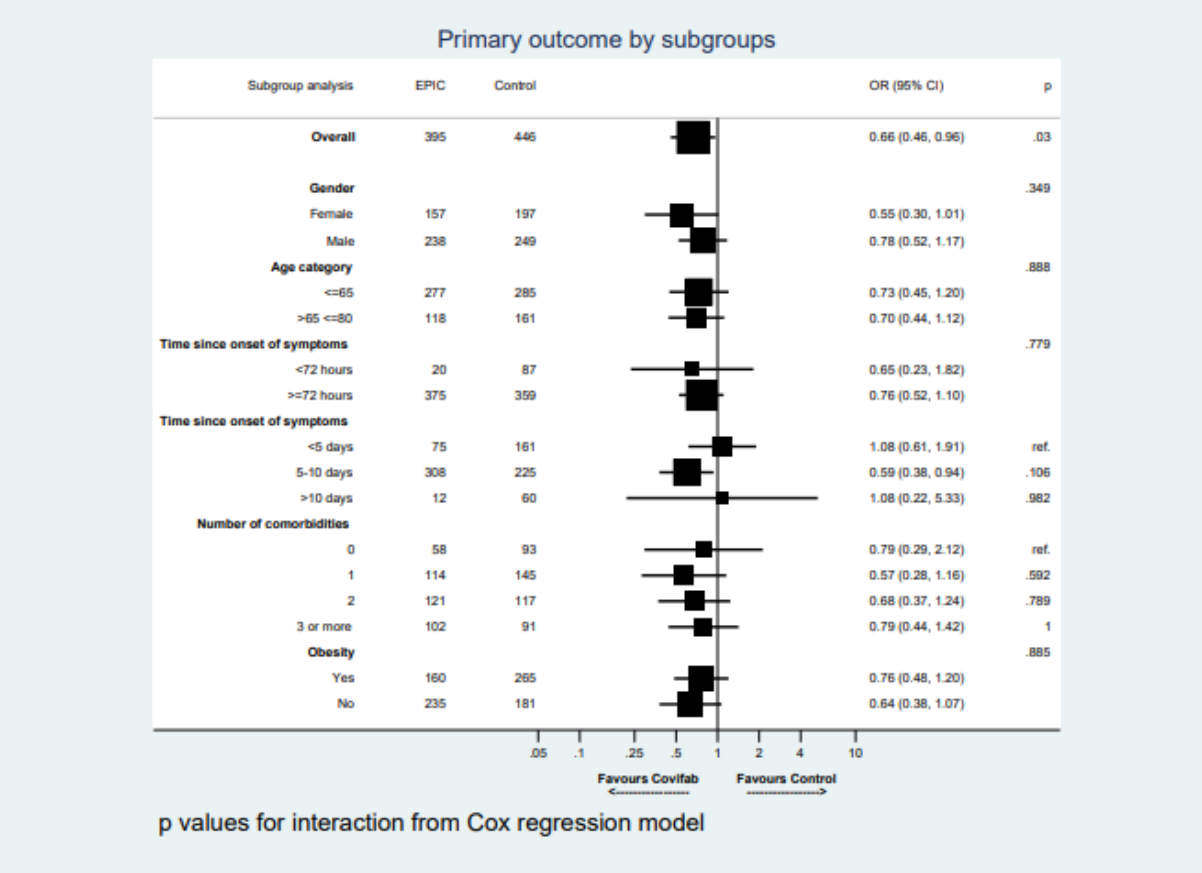

279

280 **S6 Fig. Subgroup analysis**

281

282

283

284

285

286

287

| <b>Primary outcome- Sensitivity analysis in patients with complete EPIC treatment</b>      |                              |                                                                                          |                       |                                           |                                           |                                                     |
|--------------------------------------------------------------------------------------------|------------------------------|------------------------------------------------------------------------------------------|-----------------------|-------------------------------------------|-------------------------------------------|-----------------------------------------------------|
| <b>Outcomes</b>                                                                            | <b>EPIC<br/>(N=37<br/>9)</b> | <b>Contr<br/>ol<br/>(N=44<br/>6)</b>                                                     | <b>Estimat<br/>or</b> | <b>Crude</b>                              | <b>IPTW<sup>†</sup></b>                   | <b>Doubly<br/>robust<br/>adjustment<sup>‡</sup></b> |
| Overall mortality at day 28 since hospital admission                                       | 14<br>(53)                   | 21.5<br>(96)                                                                             | OR                    | 0.59<br>(95%CI<br>0.41 - 0.86)<br>p 0.005 | 0.58 (95%CI<br>0.39 - 0.85)<br>p 0.005    | 0.57 (95%CI<br>0.37 - 0.86)<br>p 0.008              |
|                                                                                            |                              |                                                                                          | HR                    | 0.63<br>(95%CI<br>0.45 - 0.88)<br>p 0.007 | 0.61 (95%CI<br>0.43 - 0.87)<br>p 0.007    | 0.63 (95%CI<br>0.44 - 0.91)<br>p 0.013              |
| <b>Primary outcome- Sensitivity analysis Patients with Convalescent plasma versus EPIC</b> |                              |                                                                                          |                       |                                           |                                           |                                                     |
| <b>Outcomes</b>                                                                            | <b>EPIC<br/>(N=39<br/>5)</b> | <b>Contr<br/>ol<br/>with<br/>Conva<br/>lescen<br/>t<br/>plasm<br/>a<br/>(N=31<br/>7)</b> | <b>Estimat<br/>or</b> | <b>Crude</b>                              | <b>IPTW<sup>†</sup></b>                   | <b>Doubly<br/>robust<br/>adjustment<sup>‡</sup></b> |
| Overall mortality at day 28 since hospital admission                                       | 15.7<br>(62)                 | 22.7<br>(72)                                                                             | OR                    | 0.63<br>(95%CI<br>0.43 - 0.92)<br>p 0.018 | 0.62<br>(95%CI 0.42<br>- 0.93)<br>p 0.019 | 0.61<br>(95%CI 0.39<br>- 0.94)<br>p 0.025           |
|                                                                                            |                              |                                                                                          | HR                    | 0.67<br>(95%CI<br>0.48 - 0.95)<br>p 0.023 | 0.66 (95%CI<br>0.46 - 0.95)<br>p 0.023    | 0.68 (95%CI<br>0.47 - 1)<br>p 0.048                 |

|                                                             | <b>EPIC<br/>(N=395)</b> | <b>Control<br/>(N=446)</b> |
|-------------------------------------------------------------|-------------------------|----------------------------|
| <b>Any patient with an adverse event</b>                    | 24.8 (98)               | 27.1 (121)                 |
| <b>Total of adverse events</b>                              | 145                     | 168                        |
| <b>System organ classification</b>                          |                         |                            |
| <b>Blood and lymphatic system disorders</b>                 | 0                       | 0                          |
| <b>Cardiac disorders</b>                                    | 0.2 (1)                 | 0                          |
| <b>Ear and labyrinth disorders</b>                          | 0                       | 0                          |
| <b>Endocrine disorders</b>                                  | 0                       | 0                          |
| <b>Eye disorder</b>                                         | 0                       | 0                          |
| <b>Gastrointestinal disorders</b>                           | 0.2 (1)                 | 0.2 (1)                    |
| <b>General disorders and administration site conditions</b> | 9.6 (38)                | 11.1 (44)                  |
| <b>Hepatobiliary disorders</b>                              | 0                       | 0                          |
| <b>Immune system disorders</b>                              | 0                       | 0                          |
| <b>Infections and infestations</b>                          | 4.6 (18)                | 0.7 (3)                    |
| <b>Injury, poisoning and procedural complications</b>       | 0                       | 0                          |
| <b>Investigations for laboratory test results</b>           | 0                       | 0                          |

|                                                                            | <b>EPIC<br/>(N=395)</b> | <b>Control<br/>(N=446)</b> |
|----------------------------------------------------------------------------|-------------------------|----------------------------|
| <b>Any patient with an adverse event</b>                                   | 24.8 (98)               | 27.1 (121)                 |
| <b>Total of adverse events</b>                                             | 145                     | 168                        |
| <b>Metabolism and nutrition disorders</b>                                  | 0                       | 0                          |
| <b>Musculoskeletal and connective tissue disorders</b>                     | 0                       | 0                          |
| <b>Neoplasms benign, malignant and unspecified (incl cysts and polyps)</b> | 0                       | 0                          |
| <b>Nervous system disorders</b>                                            | 0.2 (1)                 | 0                          |
| <b>Pregnancy, puerperium and perinatal conditions</b>                      | 0                       | 0                          |
| <b>Psychiatric disorders</b>                                               | 0                       | 0                          |
| <b>Renal and urinary disorders</b>                                         | 0.2 (1)                 | 0                          |
| <b>Reproductive system and breast disorders</b>                            | 0                       | 0                          |
| <b>Respiratory, thoracic and mediastinal disorders</b>                     | 20.3 (80)               | 26.9 (120)                 |
| <b>Skin and subcutaneous tissue disorders</b>                              | 10.1 (4)                | 0                          |
| <b>Surgical and medical procedures</b>                                     | 0                       | 0                          |
| <b>Vascular disorders</b>                                                  | 0.2 (1)                 | 0                          |
| <b>Non-Covid death</b>                                                     | 0                       | 0                          |

291 **S4 Table. Breakdown of Adverse Events between groups**
